# Supplementary material for: Using depolarization to quantify ice nucleating particle concentrations: a new method
Source: Copernicus journal article supplement (doi:10.5194/amt-10-4639-2017), 2017-12-01
Supplement: Supplementary file 1 [file amt-10-4639-2017-supplement.pdf]

Supplement of Atmos. Meas. Tech., 10, 4639–4657, 2017  
<https://doi.org/10.5194/amt-10-4639-2017-supplement>  
© Author(s) 2017. This work is distributed under  
the Creative Commons Attribution 3.0 License.

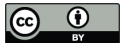

*Supplement of*

## **Using depolarization to quantify ice nucleating particle concentrations: a new method**

**Jake Zenker et al.**

*Correspondence to:* Sarah D. Brooks ([sbrooks@tamu.edu](mailto:sbrooks@tamu.edu))

The copyright of individual parts of the supplement might differ from the CC BY 3.0 License.

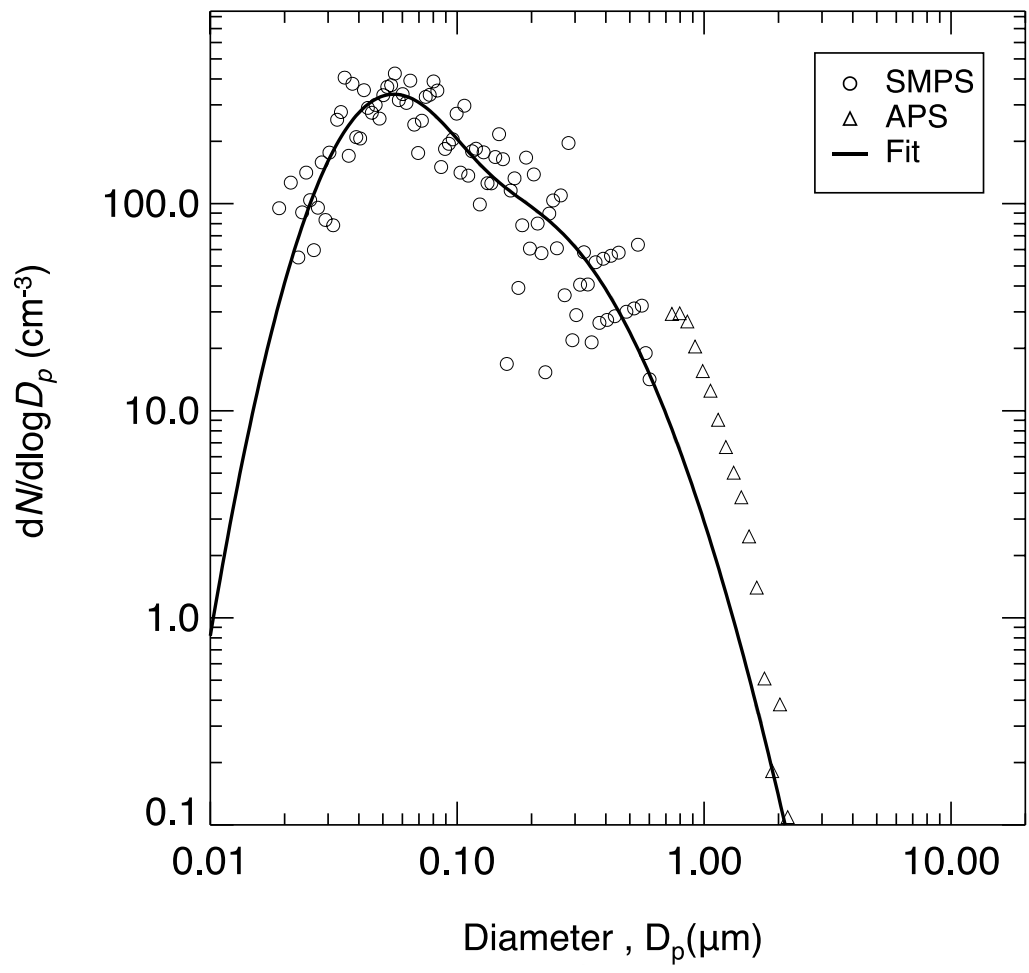

Figure S1. The number lognormal size distribution for Snomax<sup>®</sup> run on March 27<sup>th</sup> (case 27 in table) and featured in Fig. 4. SMPS data is reported as [circles](#), APS data is reported as [triangles](#), and a fit is reported as a black line.

| <b>Simulation <math>M</math></b>   |              |                    |                    |                          |
|------------------------------------|--------------|--------------------|--------------------|--------------------------|
| Segment No.                        | Ice crystals | Droplets           | Aerosol            | $\geq \delta$ -Threshold |
| 1                                  | 0            | $M \times 100$     | $M \times 300$     | .                        |
| 2                                  | 2            | $M \times 100$     | $M \times 300$     | .                        |
| 3                                  | 5            | $M \times 100$     | $M \times 300$     | .                        |
| .                                  | .            | $M \times 100$     | $M \times 300$     | .                        |
| .                                  | .            | $M \times 100$     | $M \times 300$     | .                        |
| .                                  | .            | $M \times 100$     | $M \times 300$     | .                        |
| 120                                | 350          | $M \times 100$     | $M \times 300$     | .                        |
| <b>Simulation <math>M+1</math></b> |              |                    |                    |                          |
| Segment No.                        | Ice crystals | Droplets           | Aerosol            | $\geq \delta$ -Threshold |
| 1                                  | 0            | $(M+1) \times 100$ | $(M+1) \times 300$ | .                        |
| 2                                  | 2            | $(M+1) \times 100$ | $(M+1) \times 300$ | .                        |
| 3                                  | 5            | $(M+1) \times 100$ | $(M+1) \times 300$ | .                        |
| .                                  | .            | $(M+1) \times 100$ | $(M+1) \times 300$ | .                        |
| .                                  | .            | $(M+1) \times 100$ | $(M+1) \times 300$ | .                        |
| .                                  | .            | $(M+1) \times 100$ | $(M+1) \times 300$ | .                        |
| 120                                | 350          | $(M+1) \times 100$ | $(M+1) \times 300$ | .                        |

**Table S1.** This table illustrates how the simulated data sets are constructed as detailed in section 3.7 for  $M$  and  $M+1$ .
